# Supplementary material
Source: publisher figshare collection journal article supplement (https://gsapubs.figshare.com/ndownloader/files/22397895)
Supplement: Supplementary file 1 [file 22397895]

# Electronic supplement

# Regional exhumation history of brittle crust during subduction initiation, Fiordland, southwest New Zealand, and implications for thermochronologic sampling and analysis strategies

Rupert Sutherland

GNS Science, PO Box 30-368, Lower Hutt, New Zealand. (r.sutherland@gns.cri.nz)

Michael Gurnis

Seismological Laboratory, California Institute of Technology, Pasadena, California 91125, USA. (gurnis@caltech.edu)

Peter J. J. Kamp

Department of Earth Sciences, University of Waikato, Hamilton, New Zealand. (p.kamp@waikato.ac.nz)

Martha A. House

Natural Sciences Division, Pasadena City College, 1570 East Colorado Boulevard, Building E, Room 210,Pasadena, California 91106, USA (mahouse@pasadena.edu)

Figure S1. Age differences binned by elevation (0.2 km increment), with the mean and standard errors plotted. Apatite helium (AFT) and fission track (AFT), and zircon fission track ages are shown. Young and old dates were separated because exhumation and cooling rates were much lower before 20 Ma.

# Thermochronologic data table used to compute regional exhumation history

| Sample | PJJK_label | X | Y | Z | AHE | AHE2sig | AHE  rep | AFT | AFT  2sig | AFT  Nxtal | AFT  Ns | AFT  chisq | AFT  Lmean | AFT Lmean2sig | AFT  Lsd | AFT  LN | AFT  tech | ZHE | ZHE2sig | ZHE_rep | ZFT | ZFT2sig | ZFT_Nxtal | ZFT_Ns | ZFT_chisq | ZFT_tech |
| --- | --- | --- | --- | --- | --- | --- | --- | --- | --- | --- | --- | --- | --- | --- | --- | --- | --- | --- | --- | --- | --- | --- | --- | --- | --- | --- |
|  | 8801-17 | 2117100 | 5585400 | 1097 |  |  |  |  |  |  |  |  |  |  |  |  |  |  |  |  | 49.3 | 7.2 | 8 | 829 | 4 | IJL |
|  | 8801-18 | 2108100 | 5592000 | 1052 |  |  |  |  |  |  |  |  |  |  |  |  |  |  |  |  | 35.7 | 6.4 | 12 | 1365 | <0.1 | IJL |
|  | 8801-19 | 2117300 | 5583200 | 1036 |  |  |  |  |  |  |  |  |  |  |  |  |  |  |  |  | 47.2 | 6.2 | 20 | 484 | 65 | IJL |
|  | 8801-20 | 2114200 | 5580100 | 884 |  |  |  |  |  |  |  |  |  |  |  |  |  |  |  |  | 70.3 | 9 | 7 | 605 | 70.2 | IJL |
|  | 8801-21 | 2111200 | 5593100 | 716 |  |  |  |  |  |  |  |  |  |  |  |  |  |  |  |  | 45.4 | 6.6 | 14 | 367 | 48.5 | IJL |
|  | 8801-22 | 2119900 | 5590800 | 762 |  |  |  |  |  |  |  |  |  |  |  |  |  |  |  |  | 40.2 | 4.4 | 15 | 1337 | 0.4 | IJL |
|  | 8801-23 | 2119200 | 5591300 | 792 |  |  |  |  |  |  |  |  |  |  |  |  |  |  |  |  | 32.7 | 3.2 | 11 | 964 | 9.7 | IJL |
|  | 8801-28 | 2108000 | 5594500 | 1219 |  |  |  |  |  |  |  |  |  |  |  |  |  |  |  |  | 21.8 | 9.8 | 2 | 27 | 94.9 | IJL |
|  | 8801-30 | 2115481 | 5595157 | 1470 |  |  |  |  |  |  |  |  |  |  |  |  |  |  |  |  | 35.8 | 4 | 4 | 589 | 63.8 | JMT |
|  | 8901-1 | 2020418 | 5490463 | 0 |  |  |  | 14.5 | 9.6 | 20 | 10 | 97.5 | 9.27 | 0 | 0 | 1 | XU |  |  |  | 26 | 2.8 | 5 | 582 | 34.1 | IJL |
|  | 8901-2 | 2021862 | 5486106 | 0 |  |  |  | 18.6 | 10.8 | 20 | 13 | 100 | 0 | 0 | 0 | 0 | XU |  |  |  |  |  |  |  |  |  |
|  | 8901-3 | 2022255 | 5479174 | 0 |  |  |  | 11.8 | 2.2 | 20 | 133 | 95.2 | 15.14 | 0.4 | 0.81 | 17 | XU |  |  |  |  |  |  |  |  |  |
|  | 8901-4 | 2027122 | 5477523 | 0 |  |  |  | 7.7 | 1.8 | 20 | 72 | 93.4 | 14.2 | 0.72 | 1.38 | 15 | XU |  |  |  |  |  |  |  |  |  |
|  | 8901-5 | 2034486 | 5479383 | 0 |  |  |  | 6.1 | 2 | 20 | 42 | 86.4 | 12.83 | 1.38 | 1.7 | 6 | XU |  |  |  |  |  |  |  |  |  |
|  | 8901-6 | 2038020 | 5480997 | 0 |  |  |  | 8.7 | 1.8 | 20 | 116 | 24.8 | 14.84 | 0.32 | 1.22 | 58 | XU |  |  |  | 36.3 | 3.8 | 10 | 641 | 16.9 | Xu |
|  | 8901-7 | 2040746 | 5481774 | 0 |  |  |  | 10.8 | 3.2 | 20 | 53 | 95.1 | 14.01 | 0.44 | 0.96 | 19 | XU |  |  |  | 53.4 | 8.4 | 9 | 1138 | 23.2 | Xu |
|  | 8901-8 | 2041208 | 5481416 | 0 |  |  |  | 11.4 | 9.6 | 8 | 6 | 78.4 | 0 | 0 | 0 | 0 | XU |  |  |  |  |  |  |  |  |  |
|  | 8901-9 | 2039312 | 5480197 | 0 |  |  |  | 14.3 | 4.8 | 16 | 39 | 66.3 | 0 | 0 | 0 | 0 | XU |  |  |  | 71.3 | 9.2 | 3 | 515 | 76.1 | Xu |
|  | 8901-10 | 2035582 | 5479402 | 0 |  |  |  | 11.6 | 4.4 | 8 | 30 | 97.3 | 0 | 0 | 0 | 0 | XU |  |  |  |  |  |  |  |  |  |
|  | 8901-12 | 2025970 | 5475495 | 0 |  |  |  | 8.9 | 2.4 | 20 | 55 | 99.3 | 13.69 | 1.04 | 2.42 | 21 | XU |  |  |  | 80.3 | 12.2 | 4 | 372 | 66 | Xu |
|  | 8901-13 | 2021433 | 5473864 | 0 | 8.86 | 1.1 | 2 | 9.2 | 2 | 20 | 98 | 97.5 | 13.67 | 0.6 | 1.63 | 29 | XU |  |  |  | 66.3 | 6.8 | 8 | 1662 | 3.7 | Xu |
|  | 8901-14 | 2017348 | 5472516 | 0 |  |  |  | 9.9 | 1.8 | 20 | 126 | 21.9 | 14.81 | 0.66 | 0.93 | 8 | XU |  |  |  |  |  |  |  |  |  |
|  | 8901-15 | 2014534 | 5471555 | 0 | 7.34 | 0.9 | 2 | 14.2 | 5 | 25 | 36 | 100 | 14.52 | 0.58 | 0.71 | 6 | XU |  |  |  |  |  |  |  |  |  |
|  | 8901-16 | 2012446 | 5470880 | 0 | 13.98 | 1.8 | 2 | 12 | 2.8 | 20 | 86 | 94.9 | 14.21 | 0.46 | 1.07 | 21 | XU |  |  |  | 40.2 | 4 | 20 | 2529 | 0 | Xu |
|  | 8901-17 | 2010892 | 5471036 | 0 |  |  |  | 13.6 | 4.4 | 18 | 40 | 97.4 | 14.23 | 1.72 | 1.71 | 4 | XU |  |  |  | 43.9 | 4.2 | 9 | 783 | 30.2 | Xu |
|  | 8901-18 | 2012144 | 5472519 | 0 |  |  |  | 7.6 | 2 | 20 | 61 | 87.3 | 14.42 | 0.54 | 0.7 | 7 | XU |  |  |  | 50.1 | 6.8 | 15 | 1824 | 0 | Xu |
|  | 8901-19 | 2014610 | 5472469 | 0 | 9.8 | 1.3 | 2 | 9.5 | 4.2 | 14 | 21 | 96.8 | 13.66 | 0 | 0 | 1 | XU |  |  |  | 45.9 | 5 | 7 | 628 | 7.5 | Xu |
|  | 8901-20 | 2018052 | 5474081 | 0 |  |  |  | 9.8 | 5.8 | 11 | 12 | 59.6 | 0 | 0 | 0 | 0 | XU |  |  |  |  |  |  |  |  |  |
|  | 8901-21 | 2023410 | 5475724 | 0 |  |  |  | 12.9 | 2.4 | 20 | 140 | 35.6 | 14.22 | 0.42 | 1.28 | 37 | XU |  |  |  | 91.7 | 18.8 | 3 | 210 | 67.3 | IJL |
|  | 8901-22 | 2021248 | 5479380 | 0 |  |  |  | 6.9 | 2 | 20 | 50 | 97.1 | 0 | 0 | 0 | 0 | XU |  |  |  | 45.3 | 4.6 | 15 | 2526 | 0 | Xu |
|  | 8901-23 | 2035100 | 5528244 | 0 | 6.15 | 0.8 | 2 | 5.5 | 1.8 | 20 | 43 | 99.6 | 12.28 | 0.9 | 2.88 | 40 | XU |  |  |  | 16 | 4.6 | 2 | 61 | 28.2 | Xu |
|  | 8901-24 | 2036791 | 5525535 | 0 | 4.76 | 0.6 | 2 | 5.2 | 1 | 20 | 141 | 70.3 | 14.33 | 0.28 | 1.22 | 81 | XU |  |  |  | 16.8 | 1.4 | 10 | 1123 | 21.4 | IJL |
|  | 8901-25 | 2038727 | 5524473 | 0 |  |  |  | 6.5 | 2.4 | 20 | 32 | 95.1 | 13.78 | 0.6 | 0.94 | 10 | XU |  |  |  |  |  |  |  |  |  |
|  | 8901-26 | 2043058 | 5522266 | 0 |  |  |  | 4.9 | 1 | 20 | 95 | 44.4 | 14.53 | 0.28 | 1.2 | 71 | XU |  |  |  | 17.6 | 2.4 | 5 | 290 | 53.2 | IJL |
|  | 8901-27 | 2042010 | 5519508 | 0 | 3.31 | 0.4 | 2 | 4.5 | 1.2 | 20 | 54 | 99.5 | 14.86 | 1.2 | 1.03 | 3 | XU |  |  |  |  |  |  |  |  |  |
|  | 8901-29 | 2048541 | 5516791 | 0 |  |  |  | 3.9 | 1 | 20 | 53 | 99.6 | 15.28 | 0.46 | 0.33 | 2 | XU |  |  |  | 14.5 | 10 | 2 | 44 | 0.2 | IJL |
|  | 8901-30 | 2051345 | 5513096 | 0 | 3.1 | 0.4 | 2 | 5.4 | 2 | 15 | 52 | 3.5 | 15.3 | 0 | 0 | 1 | IJL |  |  |  |  |  |  |  |  |  |
|  | 8901-31 | 2053021 | 5511207 | 0 |  |  |  | 3.9 | 1.8 | 20 | 20 | 94.5 | 0 | 0 | 0 | 0 | XU |  |  |  | 15.4 | 3.4 | 4 | 104 | 22.1 | IJL |
|  | 8901-33 | 2046016 | 5520217 | 323 | 1.33 | 0.1 | 3 | 10.3 | 6.8 | 20 | 10 | 98.6 | 0 | 0 | 0 | 0 | XU |  |  |  |  |  |  |  |  |  |
|  | 8901-34 | 2045743 | 5520121 | 463 | 1.88 | 0.2 | 5 | 3.9 | 2 | 20 | 15 | 99.4 | 15.89 | 1.62 | 1.15 | 2 | XU |  |  |  |  |  |  |  |  |  |
|  | 8901-35 | 2045469 | 5520116 | 616 | 3 | 0.3 | 4 | 5.3 | 1.8 | 20 | 35 | 99.8 | 14.93 | 0.6 | 1.08 | 13 | XU |  |  |  | 16.3 | 3 | 4 | 160 | 7.6 | Xu |
|  | 8901-36 | 2045751 | 5519664 | 768 | 2.74 | 0.4 | 2 | 5 | 2.6 | 20 | 16 | 62.5 | 15.88 | 0 | 0 | 1 | XU |  |  |  |  |  |  |  |  |  |
|  | 8901-37 | 2045753 | 5519573 | 939 | 3.84 | 0.5 | 2 | 5 | 1.4 | 20 | 49 | 99.7 | 15 | 0 | 0 | 1 | XU |  |  |  |  |  |  |  |  |  |
|  | 8901-38 | 2045652 | 5519118 | 1096 | 3.47 | 0.3 | 5 | 3.3 | 1.2 | 20 | 32 | 57.4 | 14.5 | 0 | 0 | 1 | IJL |  |  |  | 13.9 | 2.4 | 12 | 646 | < 0.1 | IJL |
|  | 8901-39 | 2045852 | 5519118 | 1274 |  |  |  | 8 | 5.4 | 20 | 9 | 89.2 | 0 | 0 | 0 | 0 | XU |  |  |  |  |  |  |  |  |  |
|  | 8901-40 | 2064898 | 5505660 | 663 |  |  |  | 4.8 | 1.8 | 20 | 32 | 99.9 | 15.11 | 0.66 | 1.03 | 10 | XU |  |  |  |  |  |  |  |  |  |
|  | 8901-41 | 2069424 | 5508022 | 663 |  |  |  | 3.2 | 1.8 | 20 | 14 | 18.1 | 14.66 | 2.02 | 1.43 | 3 | IJL |  |  |  | 53.1 | 5.2 | 20 | 952 | 86.2 | IJL |
|  | 8901-42 | 2073446 | 5507818 | 663 | 2.86 | 0.37 | 2 | 3.1 | 1 | 20 | 33 | 100 | 14.66 | 1.06 | 1.51 | 8 | XU |  |  |  | 76.9 | 37 | 3 | 274 | 0.1 | JMT |
|  | 8901-43 | 2078128 | 5506438 | 663 |  |  |  | 3.4 | 3 | 20 | 5 | 53.7 | 0 | 0 | 0 | 0 | XU |  |  |  | 82.4 | 18 | 5 | 203 | 88 | IJL |
|  | 8901-44 | 2080714 | 5504838 | 663 | 2.94 | 0.38 | 2 | 38.9 | 11 | 20 | 62 | 98.2 | 12.44 | 0.94 | 1.8 | 15 | XU |  |  |  | 92.8 | 17.6 | 10 | 591 | 1.1 | Xu |
|  | 8901-45 | 2083183 | 5504606 | 663 | 4.57 | 0.48 | 3 | 24.3 | 5.2 | 20 | 104 | 99.1 | 10.62 | 0.9 | 2.13 | 22 | XU |  |  |  | 100.1 | 10.6 | 9 | 1841 | 3.5 | Xu |
|  | 8901-46 | 2055076 | 5508595 | 190 |  |  |  | 3.8 | 1 | 20 | 57 | 99.3 | 14.46 | 0.46 | 1.31 | 34 | XU |  |  |  | 37.1 | 3.8 | 15 | 2172 | 0 | Xu |
|  | 8901-47 | 2028500 | 5506900 | 454 |  |  |  |  |  |  |  |  |  |  |  |  |  |  |  |  | 37.1 | 6.4 | 10 | 202 | 73.4 | IJL |
|  | 8901-48 | 2056488 | 5506154 | 670 |  |  |  | 3.8 | 2.2 | 20 | 13 | 94.8 | 0 | 0 | 0 | 0 | XU |  |  |  |  |  |  |  |  |  |
|  | 8901-49 | 2058099 | 5502802 | 490 |  |  |  | 4.2 | 1.2 | 20 | 51 | 100 | 14.08 | 0.98 | 1.1 | 5 | XU |  |  |  | 41.2 | 8.2 | 6 | 467 | 0.7 | Xu |
|  | 8901-50 | 2063172 | 5505174 | 265 |  |  |  | 3.7 | 2.2 | 20 | 12 | 69.4 | 14.18 | 0 | 0 | 1 | XU |  |  |  |  |  |  |  |  |  |
|  | 8901-51 | 2055341 | 5503850 | 1304 |  |  |  | 3 | 2.2 | 20 | 7 | 100 | 0 | 0 | 0 | 0 | XU |  |  |  |  |  |  |  |  |  |
|  | 8901-52 | 2055526 | 5503671 | 1448 |  |  |  | 2.5 | 0.6 | 20 | 80 | 100 | 14.43 | 0.44 | 1.27 | 35 | XU |  |  |  | 80.3 | 16.4 | 4 | 1150 | 0.1 | IJL |
|  | 8901-53 | 2069998 | 5495976 | 244 | 3.18 | 0.4 | 2 | 3.6 | 1 | 20 | 50 | 99.7 | 14.7 | 0 | 0 | 1 | XU |  |  |  | 59.4 | 7.4 | 15 | 2186 | 0.1 | Xu |
|  | 8901-54 | 2069625 | 5496426 | 387 |  |  |  | 4.3 | 1.4 | 20 | 40 | 98.6 | 15.57 | 1 | 1.23 | 6 | XU |  |  |  | 71 | 7.2 | 5 | 874 | 69.2 | IJL |
|  | 8901-55 | 2067131 | 5498027 | 425 |  |  |  | 4.4 | 2 | 20 | 20 | 99.3 | 0 | 0 | 0 | 0 | XU |  |  |  |  |  |  |  |  |  |
|  | 8901-56 | 2067035 | 5498300 | 534 |  |  |  | 4.3 | 2.4 | 20 | 13 | 89.3 | 0 | 0 | 0 | 0 | XU |  |  |  | 53.6 | 7.4 | 10 | 459 | 37.3 | IJL |
|  | 8901-59 | 2066821 | 5500123 | 1036 |  |  |  | 5.5 | 3.8 | 20 | 9 | 89.9 | 0 | 0 | 0 | 0 | XU |  |  |  |  |  |  |  |  |  |
|  | 8901-60 | 2070627 | 5496535 | 241 |  |  |  | 3.1 | 0.8 | 20 | 66 | 97.7 | 14.84 | 0.32 | 0.28 | 3 | XU |  |  |  | 66.3 | 12.2 | 6 | 956 | 0.3 | IJL |
|  | 8901-62 | 2067282 | 5499851 | 1402 | 4.64 | 0.6 | 2 | 2.9 | 0.8 | 20 | 62 | 99.5 | 0 | 0 | 0 | 0 | XU |  |  |  | 79.1 | 6.2 | 20 | 2441 | 18.5 | IJL |
|  | 8901-63 | 2084196 | 5493572 | 1010 |  |  |  | 24.4 | 4.4 | 20 | 157 | 98.5 | 13.24 | 0.3 | 1.38 | 90 | XU |  |  |  |  |  |  |  |  |  |
|  | 8901-65 | 2083518 | 5490546 | 1493 |  |  |  | 24 | 5.4 | 19 | 92 | 97.7 | 13.6 | 0.32 | 0.7 | 20 | XU |  |  |  |  |  |  |  |  |  |
|  | 8901-66 | 2082965 | 5490811 | 1706 |  |  |  | 25.5 | 5.4 | 20 | 107 | 99.8 | 13.9 | 0.3 | 1.14 | 57 | XU |  |  |  | 80.9 | 12.6 | 3 | 351 | 46 | JMT |
|  | 8901-67 | 2081479 | 5481652 | 396 |  |  |  | 24.2 | 5 | 20 | 114 | 94.3 | 14.41 | 0.8 | 0.98 | 6 | XU |  |  |  | 98.9 | 17.2 | 9 | 1331 | 0 | IJL |
|  | 8901-68 | 2079459 | 5482256 | 498 |  |  |  | 21.5 | 5 | 20 | 83 | 98.7 | 13.64 | 0.66 | 1.56 | 23 | XU |  |  |  | 91.1 | 51 | 3 | 587 | 0.1 | JMT |
|  | 8901-70 | 2076269 | 5481836 | 693 |  |  |  | 27.7 | 4.8 | 20 | 273 | 3.2 | 13.9 | 0.3 | 0.84 | 32 | XU |  |  |  | 100.3 | 10.6 | 15 | 2185 | 9.6 | IJL |
|  | 8901-71 | 2074500 | 5481900 | 793 |  |  |  | 14.7 | 4.8 | 20 | 42 | 96.1 | 13.19 | 0.32 | 0.81 | 26 | XU |  |  |  | 51.8 | 10.6 | 5 | 246 | 51.8 | Xu |
|  | 8901-72 | 2073080 | 5481416 | 1006 |  |  |  | 30.2 | 4.4 | 20 | 231 | 89.2 | 13.09 | 0.26 | 1.08 | 71 | XU |  |  |  | 110.6 | 23.6 | 5 | 811 | 0.2 | Xu |
|  | 8901-80 | 2081488 | 5481104 | 391 |  |  |  | 27.1 | 6 | 20 | 98 | 72.2 | 14.01 | 0 | 0 | 1 | IJL |  |  |  | 92.4 | 22.6 | 4 | 470 | 1.5 | IJL |
|  | 8901-81 | 2074734 | 5480805 | 1615 |  |  |  | 35.2 | 3.8 | 11 | 482 | 36.2 | 14.33 | 0.38 | 0.84 | 20 | XU |  |  |  | 92.9 | 6.4 | 20 | 6116 | 0.4 | IJL |
|  | 8901-82 | 2074558 | 5480437 | 1486 |  |  |  | 31.6 | 3.4 | 20 | 480 | 98.1 | 14.39 | 0.24 | 1.03 | 72 | IJL |  |  |  | 85.1 | 9 | 15 | 9368 | 0 | IJL |
|  | 8901-83 | 2074201 | 5479974 | 1265 |  |  |  | 30.7 | 3.6 | 10 | 367 | 19.9 | 14.21 | 0.32 | 1.16 | 54 | XU |  |  |  | 94.4 | 6.8 | 15 | 6181 | 0 | Xu |
|  | 8901-84 | 2073900 | 5480100 | 1128 |  |  |  | 28.2 | 3.6 | 20 | 333 | 19 | 13.8 | 0.24 | 0.91 | 64 | XU |  |  |  |  |  |  |  |  |  |
|  | 8901-85 | 2121987 | 5588968 | 610 |  |  |  | 2.8 | 1.6 | 20 | 14 | 96.4 | 14.86 | 0.48 | 0.33 | 2 | XU |  |  |  | 67.8 | 5.8 | 15 | 1171 | 5.6 | Xu |
|  | 8901-86 | 2122537 | 5588886 | 381 |  |  |  | 1.7 | 0.4 | 20 | 65 | 95.4 | 14.71 | 0.64 | 1.15 | 13 | XU |  |  |  | 69.3 | 11.4 | 11 | 2660 | 0 | Xu |
|  | 8901-95 | 2123402 | 5591643 | 914 |  |  |  |  |  |  |  |  |  |  |  |  |  |  |  |  | 84.4 | 13.4 | 13 | 1146 | 0 | Xu |
|  | 8901-96 | 2123214 | 5591914 | 914 |  |  |  | 1.2 | 0.6 | 20 | 17 | 99.1 | 0 | 0 | 0 | 0 | XU |  |  |  |  |  |  |  |  |  |
|  | 8901-97 | 2122769 | 5591267 | 1219 |  |  |  |  |  |  |  |  |  |  |  |  |  |  |  |  | 86.8 | 16 | 12 | 3161 | 0 | Xu |
|  | 8901-98 | 2122403 | 5591260 | 1408 |  |  |  | 2.1 | 0.6 | 20 | 47 | 99.6 | 15.27 | 0.42 | 0.51 | 6 | XU |  |  |  |  |  |  |  |  |  |
|  | 8901-99 | 2122216 | 5591531 | 1554 |  |  |  | 2 | 1 | 20 | 20 | 99.8 | 0 | 0 | 0 | 0 | XU |  |  |  | 79.3 | 9.8 | 10 | 565 | 23.8 | XU |
|  | 8901-101 | 2121841 | 5592072 | 1890 |  |  |  | 1.9 | 1.4 | 20 | 9 | 100 | 12.52 | 0.88 | 0.62 | 2 | XU |  |  |  |  |  |  |  |  |  |
|  | 8901-102 | 2117947 | 5590084 | 2195 |  |  |  | 2.4 | 0.8 | 20 | 31 | 99.8 | 14.87 | 0.88 | 1.17 | 7 | XU |  |  |  |  |  |  |  |  |  |
|  | 8901-104 | 2098869 | 5609569 | 0 |  |  |  |  |  |  |  |  |  |  |  |  |  |  |  |  | 10.4 | 2.6 | 10 | 254 | 0 | Xu |
|  | 8901-105 | 2096074 | 5612624 | 0 |  |  |  |  |  |  |  |  |  |  |  |  |  |  |  |  | 3.5 | 0.8 | 9 | 87 | 82.9 | XU |
|  | 8901-106 | 2097287 | 5611185 | 0 |  |  |  |  |  |  |  |  |  |  |  |  |  |  |  |  | 4.3 | 1 | 5 | 80 | 48.6 | Xu |
|  | 8901-109 | 2105531 | 5604937 | 0 |  |  |  | 3.2 | 1.2 | 20 | 25 | 92.6 | 0 | 0 | 0 | 0 | XU |  |  |  |  |  |  |  |  |  |
|  | 8901-110 | 2104216 | 5607617 | 1036 |  |  |  | 4.6 | 3 | 20 | 10 | 82.2 | 12.83 | 0.86 | 1.76 | 17 | XU |  |  |  | 14.1 | 2 | 15 | 318 | 97.8 | XU |
|  | 8901-112 | 2102396 | 5606525 | 1433 |  |  |  | 1.1 | 0.6 | 20 | 15 | 85.1 | 0 | 0 | 0 | 0 | XU |  |  |  |  |  |  |  |  |  |
|  | 8901-113 | 2101936 | 5606699 | 1567 |  |  |  |  |  |  |  |  |  |  |  |  |  |  |  |  | 5.3 | 1.8 | 3 | 36 | 47 | Xu |
|  | 8901-116 | 2098928 | 5606281 | 381 |  |  |  | 1.6 | 1 | 20 | 9 | 89.8 | 0 | 0 | 0 | 0 | XU |  |  |  |  |  |  |  |  |  |
|  | 8901-117 | 2116919 | 5581112 | 1173 |  |  |  | 2.7 | 0.8 | 20 | 62 | 99.9 | 13.86 | 0.72 | 1.59 | 19 | XU |  |  |  | 91.9 | 9 | 10 | 3260 | 0 | Xu |
|  | 8901-118 | 2116740 | 5580926 | 1359 |  |  |  | 1.3 | 0.6 | 20 | 20 | 93.4 | 14.76 | 0 | 0 | 1 | XU |  |  |  |  |  |  |  |  |  |
|  | 8901-119 | 2125789 | 5580722 | 1548 |  |  |  | 2.9 | 0.8 | 19 | 59 | 100 | 13.21 | 0.94 | 2.19 | 22 | XU |  |  |  | 97.3 | 12.2 | 15 | 1427 | 0.2 | Xu |
|  | 8901-120 | 2116474 | 5580464 | 1707 |  |  |  | 2.2 | 0.6 | 20 | 66 | 99.6 | 15.02 | 1.38 | 3.93 | 32 | XU |  |  |  |  |  |  |  |  |  |
|  | 8901-121 | 2116025 | 5579999 | 1993 |  |  |  | 2.1 | 0.8 | 20 | 32 | 100 | 13.63 | 1.7 | 1.47 | 3 | XU |  |  |  | 91.3 | 12.2 | 10 | 1361 | 0.3 | Xu |
|  | 8901-123 | 2117740 | 5581218 | 808 |  |  |  | 2 | 0.8 | 20 | 32 | 99.8 | 14.1 | 0.62 | 1.2 | 15 | XU |  |  |  | 74.2 | 3.6 | 10 | 5632 | 28 | Xu |
|  | 8901-124 | 2117400 | 5580200 | 808 |  |  |  | 3.9 | 1 | 20 | 64 | 89.2 | 15.66 | 1.7 | 1.48 | 4 | IWSW |  |  |  |  |  |  |  |  |  |
|  | 8901-132 | 2120920 | 5587305 | 427 |  |  |  | 1.7 | 1.4 | 20 | 7 | 99.4 | 12.57 | 1.74 | 1.5 | 3 | XU |  |  |  |  |  |  |  |  |  |
|  | 8901-133 | 2121467 | 5587405 | 410 |  |  |  | 2.4 | 1 | 20 | 28 | 94.2 | 12.41 | 1.32 | 2.72 | 17 | XU |  |  |  | 75.3 | 17.6 | 5 | 346 | 2.5 | Xu |
|  | 8901-134 | 2113513 | 5592838 | 945 |  |  |  | 2.7 | 1.6 | 20 | 11 | 23.2 | 15.35 | 0 | 0 | 1 | IWSW |  |  |  |  |  |  |  |  |  |
|  | 8901-137 | 2116054 | 5588680 | 701 |  |  |  | 2.7 | 1.6 | 20 | 13 | 86 | 0 | 0 | 0 | 0 | XU |  |  |  | 48.1 | 13.8 | 6 | 315 | 0 | Xu |
|  | 8901-139 | 2118543 | 5587444 | 640 |  |  |  | 3.2 | 2.4 | 20 | 7 | 14.1 | 0 | 0 | 0 | 0 | IJL |  |  |  | 53.1 | 7.4 | 7 | 359 | 18.1 | Xu |
|  | 8901-141 | 2120557 | 5587207 | 442 |  |  |  | 2.5 | 1 | 20 | 24 | 99.5 | 15.05 | 1.44 | 1.77 | 6 | XU |  |  |  |  |  |  |  |  |  |
|  | 8901-142 | 2107936 | 5603244 | 3 |  |  |  | 1.3 | 0.4 | 20 | 43 | 100 | 15.43 | 1 | 1.42 | 8 | XU |  |  |  |  |  |  |  |  |  |
|  | 8901-143 | 2108683 | 5602344 | 15 |  |  |  |  |  |  |  |  |  |  |  |  |  |  |  |  | 6.7 | 1.4 | 10 | 204 | 4.1 | Xu |
|  | 8901-145 | 2111600 | 5600400 | 61 |  |  |  |  |  |  |  |  |  |  |  |  |  |  |  |  | 19.1 | 1.8 | 4 | 823 | 16.1 | Xu |
|  | 8901-146 | 2110052 | 5597343 | 213 |  |  |  | 2.9 | 1.8 | 20 | 10 | 94.9 | 14.5 | 1.1 | 1.22 | 5 | XU |  |  |  |  |  |  |  |  |  |
|  | 8901-148 | 2110452 | 5595432 | 426 |  |  |  | 3.4 | 2.8 | 20 | 6 | 25.2 | 0 | 0 | 0 | 0 | XU |  |  |  |  |  |  |  |  |  |
|  | 8901-151 | 2115400 | 5558600 | 270 |  |  |  |  |  |  |  |  |  |  |  |  |  |  |  |  | 119.4 | 30 | 4 | 334 | 4.8 | Xu |
|  | 8901-153 | 2093927 | 5543250 | 663 |  |  |  | 42.2 | 11.4 | 19 | 245 | 2.3 | 11.4 | 1.08 | 1.85 | 13 | IJL |  |  |  |  |  |  |  |  |  |
|  | 8901-154 | 2094887 | 5540617 | 663 |  |  |  | 35.7 | 6.4 | 20 | 152 | 20.4 | 12.72 | 0.72 | 1.35 | 15 | IJL |  |  |  |  |  |  |  |  |  |
|  | 8901-155 | 2094400 | 5540700 | 663 |  |  |  | 52.9 | 13.8 | 20 | 76 | 6.1 | 11.49 | 0.94 | 1.15 | 7 | IJL |  |  |  |  |  |  |  |  |  |
|  | 8901-156 | 2093600 | 5541400 | 663 |  |  |  | 57.9 | 6.6 | 15 | 453 | 78.5 | 11.29 | 0.84 | 1.91 | 22 | IJL |  |  |  |  |  |  |  |  |  |
|  | 8901-157 | 2093400 | 5541500 | 663 |  |  |  | 73.3 | 12.4 | 20 | 193 | 80.4 | 12.88 | 0.52 | 0.78 | 10 | IJL |  |  |  |  |  |  |  |  |  |
|  | 8901-158 | 2093400 | 5542100 | 663 |  |  |  | 34.2 | 16.2 | 6 | 21 | 78.3 | 11.05 | 0.52 | 1.87 | 52 | IJL |  |  |  |  |  |  |  |  |  |
|  | 8901-159 | 2092400 | 5543400 | 663 |  |  |  | 77.8 | 9.6 | 20 | 385 | 67.7 | 11.63 | 0.46 | 1.93 | 70 | IJL |  |  |  |  |  |  |  |  |  |
|  | 8901-160 | 2092900 | 5543600 | 663 |  |  |  | 74.4 | 6.4 | 19 | 933 | 70.3 | 12.81 | 0.38 | 1.18 | 40 | IJL |  |  |  |  |  |  |  |  |  |
|  | 8901-161 | 2093300 | 5543500 | 663 |  |  |  | 5.8 | 5.8 | 7 | 4 | 71.3 | 0 | 0 | 0 | 0 | IJL |  |  |  |  |  |  |  |  |  |
|  | 8901-162 | 2093700 | 5547000 | 663 |  |  |  | 48.7 | 9 | 20 | 553 | 0.1 | 11.54 | 0.8 | 2.18 | 29 | IJL |  |  |  |  |  |  |  |  |  |
|  | 8901-163 | 2094400 | 5546200 | 663 |  |  |  | 16.7 | 6.8 | 18 | 27 | 77.5 | 0 | 0 | 0 | 0 | IJL |  |  |  |  |  |  |  |  |  |
|  | 8901-164 | 2095100 | 5545500 | 663 |  |  |  | 27.1 | 6.4 | 20 | 83 | 44.2 | 11.82 | 0.86 | 3.07 | 50 | XU |  |  |  |  |  |  |  |  |  |
|  | 8901-165 | 2096300 | 5545300 | 663 |  |  |  | 30.5 | 5.4 | 13 | 157 | 19.8 | 12.53 | 1.02 | 1.53 | 10 | IJL |  |  |  |  |  |  |  |  |  |
|  | 8901-166 | 2097400 | 5545400 | 663 |  |  |  | 37.2 | 8.8 | 20 | 213 | 0.8 | 11.64 | 0.54 | 1.92 | 52 | IJL |  |  |  |  |  |  |  |  |  |
|  | 8901-167 | 2086629 | 5521839 | 1463 |  |  |  | 73.5 | 12.2 | 10 | 203 | 72.8 | 12.3 | 2.16 | 2.87 | 7 | IJL |  |  |  |  |  |  |  |  |  |
|  | 8901-169 | 2090952 | 5520087 | 762 |  |  |  | 53.5 | 7.8 | 20 | 592 | 0.2 | 13.78 | 0.34 | 1.36 | 67 | IJL |  |  |  | 100 | 9.8 | 20 | 2778 | 3.7 | IJL |
|  | 8901-171 | 2091138 | 5519908 | 655 |  |  |  | 65.9 | 6.2 | 20 | 724 | 32.2 | 13.31 | 0.34 | 1.73 | 103 | IJL |  |  |  | 85.1 | 10.4 | 17 | 2035 | 0 | Xu |
|  | 8901-172 | 2092901 | 5565155 | 663 | 1.9 | 0.2 | 2 | 2.1 | 0.8 | 19 | 33 | 20.9 | 14.9 | 0.94 | 1.48 | 11 | IJL |  |  |  | 85.4 | 8.4 | 15 | 1958 | 57 | Xu |
|  | 8901-174 | 2093693 | 5561698 | 663 | 1.51 | 0.2 | 2 | 3.7 | 1.4 | 20 | 26 | 41.1 | 0 | 0 | 0 | 0 | IJL |  |  |  | 91.4 | 7.2 | 13 | 2225 | 5.5 | Xu |
|  | 8901-176 | 2094833 | 5559251 | 663 | 2.44 | 0.3 | 2 | 6.9 | 2.4 | 20 | 34 | 99.6 | 13.98 | 1 | 1.21 | 6 | XU |  |  |  |  |  |  |  |  |  |
|  | 8901-178 | 2096951 | 5558284 | 663 |  |  |  | 2.7 | 1.2 | 20 | 20 | 92.8 | 0 | 0 | 0 | 0 | XU |  |  |  |  |  |  |  |  |  |
|  | 8901-179 | 2097611 | 5557108 | 663 |  |  |  |  |  |  |  |  |  |  |  |  |  |  |  |  | 99.1 | 18.8 | 6 | 1191 | 0 | Xu |
|  | 8901-180 | 2098637 | 5555939 | 663 |  |  |  | 5.2 | 2.6 | 20 | 16 | 94.1 | 0 | 0 | 0 | 0 | XU |  |  |  | 85.6 | 10.4 | 15 | 2458 | 1.1 | XU |
|  | 8901-181 | 2099473 | 5555131 | 663 | 3.2 | 0.4 | 2 | 4.2 | 2.6 | 20 | 11 | 99.5 | 0 | 0 | 0 | 0 | XU |  |  |  |  |  |  |  |  |  |
|  | 8901-182 | 2099564 | 5555133 | 663 | 1.79 | 0.2 | 3 | 6 | 2 | 20 | 40 | 6.4 | 13.67 | 1.22 | 1.5 | 6 | XU |  |  |  |  |  |  |  |  |  |
|  | 8901-183 | 2099846 | 5554681 | 663 |  |  |  | 3.9 | 1.6 | 20 | 23 | 94.3 | 13.4 | 1.54 | 1.72 | 5 | XU |  |  |  |  |  |  |  |  |  |
|  | 8901-185 | 2100668 | 5554695 | 663 | 1.54 | 0.2 | 2 | 2.7 | 1.2 | 20 | 23 | 99.8 | 0 | 0 | 0 | 0 | XU |  |  |  |  |  |  |  |  |  |
|  | 8901-186 | 2100944 | 5554609 | 663 | 1.76 | 0.2 | 2 | 3.9 | 1.2 | 20 | 42 | 98.9 | 12.88 | 0.84 | 0.6 | 2 | XU |  |  |  |  |  |  |  |  |  |
|  | 8901-187 | 2102040 | 5554628 | 663 | 0.93 | 0.1 | 2 | 5.3 | 2.6 | 16 | 18 | 98.6 | 0 | 0 | 0 | 0 | XU |  |  |  |  |  |  |  |  |  |
|  | 8901-188 | 2102890 | 5558206 | 663 |  |  |  | 3.4 | 2 | 20 | 26 | 2.5 | 13.57 | 1.58 | 0.79 | 2 | IWSW |  |  |  |  |  |  |  |  |  |
|  | 8901-189 | 2108540 | 5569360 | 663 |  |  |  | 2.2 | 0.6 | 20 | 53 | 80.4 | 14.05 | 0.94 | 1.98 | 18 | XU |  |  |  |  |  |  |  |  |  |
|  | 8901-190 | 2107756 | 5572362 | 663 |  |  |  | 7 | 2.8 | 20 | 27 | 99.9 | 13.5 | 0 | 0 | 1 | XU |  |  |  | 70.6 | 15 | 8 | 193 | 86.8 | IJL |
|  | 8901-191 | 2106471 | 5572704 | 663 |  |  |  | 5.4 | 2.4 | 20 | 20 | 98 | 0 | 0 | 0 | 0 | XU |  |  |  |  |  |  |  |  |  |
|  | 8901-192 | 2108579 | 5567169 | 663 |  |  |  | 3 | 1.2 | 20 | 23 | 28.7 | 14.38 | 2.24 | 1.59 | 2 | XU |  |  |  | 84.8 | 12.4 | 6 | 459 | 5.2 | Xu |
|  | 8901-193 | 2108597 | 5566164 | 663 |  |  |  | 2.7 | 1.8 | 11 | 9 | 99 | 0 | 0 | 0 | 0 | XU |  |  |  |  |  |  |  |  |  |
|  | 8901-194 | 2106133 | 5560821 | 663 |  |  |  | 2.7 | 1.6 | 19 | 12 | 64.4 | 13.07 | 1.96 | 1.39 | 2 | XU |  |  |  |  |  |  |  |  |  |
|  | 8901-196 | 2105824 | 5557618 | 663 |  |  |  | 5.9 | 2 | 20 | 33 | 85.6 | 12.89 | 0 | 0 | 1 | XU |  |  |  |  |  |  |  |  |  |
|  | 8901-197 | 2105742 | 5557069 | 663 |  |  |  | 7.7 | 3.2 | 20 | 26 | 99.6 | 0 | 0 | 0 | 0 | XU |  |  |  |  |  |  |  |  |  |
|  | 8901-198 | 2105479 | 5556425 | 663 |  |  |  | 10 | 3.8 | 20 | 30 | 97.7 | 12.3 | 2.2 | 1.9 | 3 | XU |  |  |  |  |  |  |  |  |  |
|  | 8901-199 | 2104599 | 5554582 | 663 |  |  |  | 11.9 | 5.2 | 20 | 22 | 49.1 | 12.37 | 2.56 | 2.21 | 3 | XU |  |  |  |  |  |  |  |  |  |
|  | 8901-200 | 2104626 | 5553030 | 663 |  |  |  | 15.8 | 2.8 | 20 | 138 | 85.2 | 12.25 | 0.8 | 1.26 | 10 | XU |  |  |  |  |  |  |  |  |  |
|  | 8901-201 | 2073244 | 5529917 | 663 |  |  |  | 3.4 | 1.4 | 20 | 28 | 99.7 | 13.74 | 1.18 | 0.84 | 2 | XU |  |  |  |  |  |  |  |  |  |
|  | 8901-202 | 2074610 | 5530123 | 663 |  |  |  | 9 | 4.8 | 20 | 15 | 93.6 | 14.09 | 0.86 | 1.13 | 7 | XU |  |  |  | 42.7 | 5.6 | 12 | 899 | 1.1 | Xu |
|  | 8901-203 | 2078256 | 5530553 | 663 |  |  |  | 3.7 | 0.8 | 20 | 77 | 99 | 15.67 | 0.44 | 0.43 | 4 | XU |  |  |  |  |  |  |  |  |  |
|  | 8901-204 | 2082696 | 5527342 | 663 |  |  |  | 15.7 | 3.2 | 20 | 113 | 38.8 | 12.39 | 1.06 | 2.2 | 17 | XU |  |  |  | 86.7 | 8.2 | 20 | 2446 | 0.9 | IJL |
|  | 8901-205 | 2086500 | 5527000 | 663 |  |  |  | 37 | 4.2 | 20 | 434 | 29.1 | 13.11 | 0.26 | 1.29 | 100 | IJL |  |  |  |  |  |  |  |  |  |
|  | 8901-206 | 2089010 | 5526722 | 663 |  |  |  | 29.3 | 8.2 | 20 | 60 | 66.4 | 12.41 | 0.74 | 0.97 | 7 | XU |  |  |  | 90 | 10.6 | 6 | 760 | 33 | IJL |
|  | 8901-208 | 2092919 | 5527794 | 663 |  |  |  | 29.4 | 7 | 20 | 83 | 92.7 | 12.19 | 0.18 | 0.16 | 3 | XU |  |  |  |  |  |  |  |  |  |
|  | 8901-209 | 2095016 | 5528014 | 663 |  |  |  | 25.8 | 5.4 | 20 | 109 | 99.5 | 14.24 | 0.42 | 0.29 | 2 | XU |  |  |  |  |  |  |  |  |  |
|  | 8901-210 | 2096730 | 5529232 | 663 |  |  |  | 24.9 | 3.6 | 20 | 235 | 27.5 | 13.36 | 1.02 | 1.15 | 5 | XU |  |  |  |  |  |  |  |  |  |
|  | 8901-211 | 2099900 | 5539300 | 663 |  |  |  | 32 | 5.4 | 20 | 383 | 3.2 | 12.71 | 0.36 | 1.32 | 53 | XU |  |  |  |  |  |  |  |  |  |
|  | 8901-212 | 2059917 | 5460733 | 450 |  |  |  | 7.1 | 1.2 | 20 | 152 | 28.7 | 13.52 | 3.44 | 1.72 | 2 | IWSW |  |  |  | 50.1 | 8.6 | 6 | 247 | 90.3 | IJL |
|  | 8901-213 | 2061201 | 5460390 | 450 |  |  |  |  |  |  |  |  |  |  |  |  |  |  |  |  | 87.2 | 13.4 | 7 | 442 | 16.5 | IJL |
|  | 8901-214 | 2061300 | 5460400 | 450 |  |  |  | 3.6 | 1.8 | 20 | 16 | 77.2 | 11.94 | 1.86 | 0.93 | 2 | IJL |  |  |  |  |  |  |  |  |  |
|  | 8901-217 | 2065774 | 5460011 | 450 |  |  |  | 11.2 | 10.4 | 9 | 40 | 0.5 | 16.27 | 0 | 0 | 1 | IJL |  |  |  | 66 | 11.2 | 5 | 622 | 3.8 | Xu |
|  | 8901-218 | 2066983 | 5458753 | 450 |  |  |  | 10.1 | 3.4 | 20 | 36 | 88.5 | 14.13 | 1.22 | 1.92 | 10 | XU |  |  |  | 74.5 | 20.8 | 4 | 285 | 5.4 | IJL |
|  | 8901-219 | 2068705 | 5448736 | 450 |  |  |  | 23 | 4.2 | 24 | 145 | 68.2 | 12.75 | 0.52 | 1.24 | 23 | XU |  |  |  | 74.8 | 10.8 | 15 | 1132 | 2.4 | Xu |
|  | 8901-220 | 2068791 | 5449103 | 450 |  |  |  |  |  |  |  |  |  |  |  |  |  |  |  |  | 63.7 | 16 | 4 | 148 | 30.5 | IJL |
|  | 8901-221 | 2068700 | 5450500 | 450 |  |  |  | 10.1 | 4.6 | 20 | 20 | 48.9 | 11.6 | 1.42 | 1.41 | 4 | XU |  |  |  |  |  |  |  |  |  |
|  | 8901-222 | 2068300 | 5452600 | 450 |  |  |  | 1.8 | 1.6 | 11 | 5 | 94.7 | 12.92 | 1.36 | 1.92 | 8 | IJL |  |  |  |  |  |  |  |  |  |
|  | 8901-223 | 2068258 | 5453569 | 450 |  |  |  | 6 | 2.4 | 20 | 55 | 0.7 | 14.25 | 0.48 | 0.97 | 16 | IJL |  |  |  | 62.1 | 8 | 4 | 493 | 99.9 | IJL |
|  | 8901-225 | 2067935 | 5456486 | 450 |  |  |  | 6.9 | 2.2 | 13 | 40 | 85.1 | 14.03 | 0.74 | 1.1 | 9 | XU |  |  |  | 73.2 | 7.6 | 20 | 888 | 57.2 | IJL |
|  | 8901-226 | 2055200 | 5467910 | 450 |  |  |  | 4.4 | 3.4 | 20 | 7 | 38.9 | 14.27 | 0.56 | 1.42 | 26 | IJL |  |  |  |  |  |  |  |  |  |
|  | 8901-228 | 2056911 | 5465614 | 450 |  |  |  |  |  |  |  |  |  |  |  |  |  |  |  |  | 80.2 | 5.4 | 15 | 2913 | 57.6 | IJL |
|  | 8901-229 | 2057014 | 5464976 | 450 |  |  |  | 4.5 | 1.6 | 20 | 32 | 59.6 | 12.59 | 3.86 | 2.73 | 3 | IJL |  |  |  |  |  |  |  |  |  |
|  | 8901-231 | 2058537 | 5461349 | 450 |  |  |  | 3.7 | 1.2 | 20 | 35 | 6.4 | 11.49 | 2.04 | 2.7 | 8 | IJL |  |  |  | 76.6 | 10.2 | 11 | 509 | 75.1 | IJL |
|  | 8901-232 | 2066266 | 5457919 | 777 | 7.52 | 1 | 2 | 21.8 | 4.2 | 20 | 132 | 93.3 | 13.1 | 1.02 | 2.48 | 24 | XU |  |  |  | 84.8 | 11.8 | 9 | 497 | 33.6 | IJL |
|  | 8901-233 | 2066628 | 5458108 | 640 | 7.5 | 1 | 2 | 7 | 4.2 | 20 | 11 | 69.4 | 13.5 | 1.8 | 1.8 | 5 | IJL |  |  |  | 63.2 | 24.2 | 2 | 53 | 32.4 | IJL |
|  | 8901-234 | 2066715 | 5458383 | 457 | 6.64 | 0.7 | 3 | 6.1 | 5 | 20 | 6 | 100 | 0 | 0 | 0 | 0 | IJL |  |  |  |  |  |  |  |  |  |
|  | 8901-235 | 2066805 | 5458476 | 335 | 6.43 | 0.8 | 2 | 4.4 | 2.2 | 20 | 17 | 91.5 | 15.69 | 1.02 | 1.02 | 5 | IJL |  |  |  |  |  |  |  |  |  |
|  | 8901-236 | 2065400 | 5457600 | 1021 | 10.35 | 1.9 | 1 | 5.7 | 2.8 | 20 | 18 | 97.9 | 13.29 | 0.68 | 2.01 | 34 | IJL |  |  |  |  |  |  |  |  |  |
|  | 8901-237 | 2064535 | 5457707 | 1173 | 10.38 | 1.3 | 2 | 17.3 | 3.4 | 20 | 263 | 3.5 | 12.59 | 1.06 | 2.36 | 21 | IJL |  |  |  | 73.6 | 10 | 7 | 546 | 73.8 | IJL |
|  | 8901-238 | 2063448 | 5457140 | 1344 | 7.87 | 0.8 | 3 | 11.9 | 2.8 | 17 | 81 | 8.9 | 13.86 | 1.4 | 1.85 | 8 | IJL |  |  |  | 97.8 | 10.8 | 15 | 2114 | 0.6 | IJL |
|  | 8901-239 | 2063179 | 5456862 | 1518 | 8.47 | 1.1 | 2 | 14.4 | 3 | 12 | 102 | 67.6 | 13.41 | 0.68 | 1.27 | 14 | XU |  |  |  | 95.8 | 13.8 | 20 | 908 | 1 | IJL |
|  | 9701-173 | 2060500 | 5483000 | 1265 |  |  |  | 8.2 | 2.6 | 20 | 44 | 96 | 0 | 0 | 0 | 0 | XU |  |  |  | 71 | 5 | 19 | 3304 | 14.4 | Xu |
|  | 9701-174 | 2042200 | 5480800 | 280 | 5.2 | 0.7 | 2 | 8.5 | 3.4 | 20 | 26 | 99.9 | 13.83 | 0.84 | 1.94 | 21 | XU |  |  |  |  |  |  |  |  |  |
|  | 9701-175 | 2033700 | 5481600 | 0 |  |  |  | 8 | 3.2 | 20 | 27 | 99.7 | 14.15 | 1.38 | 1.68 | 6 | XU |  |  |  | 22.9 | 2.6 | 20 | 1181 | 0.3 | Xu |
|  | 9701-176 | 2032200 | 5489300 | 0 |  |  |  | 7 | 2.2 | 20 | 43 | 97.9 | 13.64 | 0.78 | 1.85 | 22 | XU |  |  |  | 14.6 | 1.2 | 20 | 2502 | <0.1 | Xu |
|  | 9701-177 | 2033300 | 5490000 | 0 |  |  |  | 6.4 | 0.8 | 20 | 249 | 94.3 | 14.49 | 0.46 | 1.56 | 49 | XU |  |  |  | 20.3 | 1.6 | 20 | 3474 | <0.1 | Xu |
|  | 9701-178 | 2026500 | 5488300 | 0 |  |  |  | 9.6 | 1.4 | 20 | 212 | 97.2 | 14.58 | 0.28 | 1.4 | 100 | XU |  |  |  |  |  |  |  |  |  |
| MH0245 | 2002-6 | 2079847 | 5566326 | 1159 |  |  |  | 5.7 | 3 | 20 | 16 | 99.3 | 13.89 | 0 | 0 | 1 | XU |  |  |  | 45.3 | 6.4 | 15 | 1372 | 0.1 | Xu |
| MH0279 | 2002-7 | 2067748 | 5572488 | 0 |  |  |  | 4.3 | 1.2 | 20 | 50 | 99.7 | 13.8 | 0.62 | 0.61 | 4 | XU |  |  |  | 16.8 | 3.8 | 15 | 622 | 0 | Xu |
| MH0281 | 2002-8 | 2066493 | 5576719 | 0 |  |  |  | 4 | 1.2 | 20 | 41 | 99.8 | 13.04 | 1.22 | 1.21 | 4 | XU |  |  |  | 13 | 2.2 | 13 | 212 | 5 | Xu |
| MH0284 | 2002-9 | 2064138 | 5582170 | 0 |  |  |  | 7 | 2.2 | 20 | 40 | 99.9 | 13.18 | 0.98 | 1.54 | 10 | XU |  |  |  | 9.4 | 1.8 | 15 | 641 | 0 | Xu |
| MH0258 | 2002-10 | 2033440 | 5519795 | 1100 |  |  |  | 12.1 | 3.8 | 20 | 42 | 100 | 13.55 | 0.76 | 1.36 | 13 | XU |  |  |  | 19.4 | 3 | 15 | 831 | 0 | Xu |
| MH0296 | 2002-11 | 2028700 | 5529516 | 0 |  |  |  | 6.9 | 2.4 | 20 | 33 | 100 | 13.27 | 0 | 0 | 1 | XU |  |  |  | 22.2 | 2.8 | 15 | 494 | 9.3 | Xu |
| MH0213 | 2002-12 | 2068860 | 5533948 | 933 |  |  |  | 7.3 | 4.2 | 20 | 13 | 75.5 | 13.46 | 0.72 | 0.71 | 4 | XU |  |  |  | 88.8 | 15.6 | 15 | 2522 | 0 | Xu |
| MH0286 | 2002-13 | 2080443 | 5593803 | 0 |  |  |  | 7.9 | 5.2 | 20 | 10 | 96.8 | 9.42 | 3.48 | 2.46 | 2 | XU |  |  |  | 8.6 | 1.4 | 16 | 340 | 3 | Xu |
| MH0237 | 2002-14 | 2092803 | 5586005 | 1024 |  |  |  | 7.3 | 3 | 20 | 25 | 99.9 | 14.75 | 0.96 | 0.96 | 4 | XU |  |  |  | 19 | 2 | 15 | 619 | 68.1 | Xu |
| MH0241 | 2002-15 | 2092653 | 5577095 | 1200 |  |  |  | 7.2 | 2.8 | 20 | 26 | 99.9 | 13.07 | 1.18 | 1.43 | 6 | XU |  |  |  | 39.5 | 3.8 | 15 | 1236 | 8.6 | Xu |
| MH0238 | 2002-16 | 2088264 | 5594238 | 970 |  |  |  | 5.7 | 3.4 | 21 | 11 | 100 | 12.45 | 0 | 0 | 1 | XU |  |  |  | 9.2 | 1.2 | 30 | 775 | 0 | Xu |
| MH0236 | 2002-18 | 2105731 | 5589863 | 451 |  |  |  | 4.4 | 1.2 | 20 | 61 | 50.3 | 13.67 | 1.1 | 1.09 | 4 | XU |  |  |  | 32.9 | 4.2 | 15 | 1385 | 0.2 | Xu |
| MH0270 | 2002-19 | 2042684 | 5547536 | 0 |  |  |  | 6.8 | 2.2 | 20 | 41 | 99.9 | 14.47 | 0.52 | 0.99 | 15 | XU |  |  |  | 24.9 | 2.6 | 30 | 2040 | 0 | Xu |
| MH0212 | 2002-20 | 2066347 | 5541171 | 1110 |  |  |  | 5.8 | 2 | 20 | 34 | 99.6 | 14.61 | 0.9 | 1.1 | 6 | XU |  |  |  | 37.2 | 3.4 | 30 | 2978 | 0 | Xu |
| MH02105 | 2002-21 | 2019963 | 5462543 | 0 |  |  |  | 12.7 | 5.4 | 20 | 23 | 97.1 | 14.21 | 0.98 | 0.98 | 4 | XU |  |  |  | 70.2 | 7 | 15 | 1471 | 65.6 | Xu |
| SH1 | 2002-22 | 2072927 | 5424610 | 0 |  |  |  | 20.3 | 9.2 | 20 | 22 | 100 | 14.63 | 0 | 0 | 2 | XU |  |  |  | 99.9 | 12 | 15 | 1136 | 7.7 | Xu |
| MH0226 | 2002-23 | 2049302 | 5473648 | 988 |  |  |  | 6.7 | 3.2 | 20 | 19 | 97.2 | 13.97 | 0.56 | 0.55 | 4 | XU |  |  |  | 103.3 | 12 | 15 | 1229 | 97.8 | Xu |
| MH0229 | 2002-24 | 2042780 | 5444655 | 960 |  |  |  | 9.9 | 2.4 | 20 | 69 | 83.2 | 11.93 | 0.66 | 0.57 | 3 | XU |  |  |  | 101.7 | 16 | 15 | 1844 | 0 | Xu |
| GI1 | 2002-25 | 2032286 | 5425644 | 0 |  |  |  | 46.8 | 6.2 | 20 | 323 | 95.3 | 11.74 | 0.66 | 1.03 | 10 | XU |  |  |  | 106.1 | 17.2 | 15 | 1571 | 0.1 | Xu |
| P65417 | 2002-26 | 2000930 | 5459920 | 988 |  |  |  | 15.8 | 4.8 | 20 | 50 | 99.6 | 13 | 0.24 | 0.17 | 2 | XU |  |  |  | 133.2 | 14.8 | 15 | 1739 | 79.6 | Xu |
| MH0244 | 2002-27 | 2085248 | 5567329 | 1112 |  |  |  | 6 | 2.2 | 20 | 29 | 100 | 14.53 | 0.88 | 1.16 | 7 | XU |  |  |  | 62.9 | 5.4 | 15 | 2271 | 25.2 | Xu |
| MH0272 | 2002-28 | 2039241 | 5549874 | 0 |  |  |  | 6.6 | 2.4 | 20 | 30 | 99.8 | 13.75 | 1.14 | 0.81 | 2 | XU |  |  |  | 31.2 | 2.6 | 30 | 1734 | 42.1 | Xu |
| MH02-102 | 2002-29 | 2001923 | 5467842 | 0 |  |  |  | 15.6 | 4.4 | 20 | 58 | 93.2 | 13.19 | 0.96 | 1.28 | 7 | XU |  |  |  | 47.1 | 6.2 | 8 | 555 | 83..6 | Xu |
| MH0269 | 2002-30 | 2050000 | 5542500 | 0 |  |  |  | 8.1 | 3.6 | 20 | 22 | 100 | 13.85 | 2.14 | 1.51 | 2 | XU |  |  |  | 17 | 3.2 | 15 | 379 | 0.1 | Xu |
| MH02-108 | 2002-33 | 2013139 | 5450969 | 0 | 14.1 | 2.3 | 2 | 19.1 | 3.6 | 20 | 133 | 99.1 | 13.26 | 1.92 | 2.15 | 5 | XU |  |  |  |  |  |  |  |  |  |
| MH02-31 | 2002-34 | 2034607 | 5433996 | 1136 | 18.4 | 2.5 | 3 | 51.3 | 7.2 | 20 | 281 | 34.1 | 11.31 | 1.06 | 1.83 | 12 | XU | 112.2 | 25.4 | 2 |  |  |  |  |  |  |
| MH02-110 | 2002-35 | 2036014 | 5454915 | 0 | 6.5 | 0.9 | 3 | 11.9 | 1.8 | 20 | 194 | 1.8 | 11.77 | 0.68 | 0.89 | 7 | XU |  |  |  |  |  |  |  |  |  |
| MH02-112 | 2002-36 | 2029753 | 5449760 | 0 | 11.2 | 1.5 | 3 | 13.5 | 2.6 | 20 | 117 | 99.8 | 13.3 | 0.72 | 1.52 | 18 | XU |  |  |  |  |  |  |  |  |  |
| MH02-114 | 2002-37 | 2025470 | 5441544 | 0 | 11.9 | 1.6 | 3 | 24.9 | 5.2 | 20 | 105 | 84.3 | 13.47 | 1.76 | 2.49 | 8 | XU |  |  |  |  |  |  |  |  |  |
| MH02-106 | 2002-38 | 2018023 | 5458693 | 0 | 10 | 1.4 | 3 | 15.7 | 5.6 | 20 | 34 | 99.8 | 13.81 | 0 | 0 | 1 | XU |  |  |  |  |  |  |  |  |  |
| MH02-76 | 2002-39 | 2072087 | 5565827 | 0 | 1.9 | 0.3 | 3 |  |  |  |  |  |  |  |  |  |  | 4.3 | 1 | 2 | 28 | 4.2 | 15 | 780 | 0.3 | Xu |
| MH02-14 | 2002-40 | 2066811 | 5529181 | 1122 | 5.1 | 0.8 | 2 |  |  |  |  |  |  |  |  |  |  |  |  |  | 59.5 | 11.4 | 9 | 681 | 1.3 | Xu |
| MH02-19 | 0301-18 | 2057436 | 5506176 | 1188 | 3.5 | 0.6 | 3 | 4.1 | 1.4 | 20 | 42 | 100 | 0 | 0 | 0 | 0 | 0 |  |  |  |  |  |  |  |  |  |
| MH02-21 | 0301-19 | 2062440 | 5507114 | 1501 | 4.2 | 0.6 | 3 | 7.5 | 1.8 | 20 | 81 | 63.3 | 0 | 0 | 0 | 0 | 0 |  |  |  |  |  |  |  |  |  |
| MH02-22 | 0301-20 | 2062373 | 5505909 | 850 | 2.8 | 0.4 | 3 | 4.5 | 3 | 20 | 9 | 99.3 | 0 | 0 | 0 | 0 | 0 |  |  |  |  |  |  |  |  |  |
| P68345 | 0301-21 | 2055382 | 5509157 | 10 |  |  |  | 6.1 | 1.8 | 20 | 45 | 99.7 | 0 | 0 | 0 | 0 | 0 |  |  |  |  |  |  |  |  |  |
| P68502 | 0301-22 | 2056974 | 5508321 | 10 |  |  |  | 8.8 | 4.2 | 20 | 19 | 99.9 | 0 | 0 | 0 | 0 | 0 |  |  |  |  |  |  |  |  |  |
| P68650 | 0301-24 | 2059141 | 5507184 | 10 |  |  |  | 8.9 | 6.4 | 20 | 8 | 99.4 | 0 | 0 | 0 | 0 | 0 |  |  |  |  |  |  |  |  |  |
| P68686 | 0301-25 | 2060741 | 5506344 | 10 | 1.55 | 0.18 | 2 | 7.9 | 2.8 | 20 | 36 | 99.9 | 0 | 0 | 0 | 0 | 0 |  |  |  |  |  |  |  |  |  |
| P68693 | 0301-26 | 2060805 | 5506310 | 10 | 1.63 | 0.19 | 2 | 6.8 | 0.8 | 20 | 432 | 15.2 | 0 | 0 | 0 | 0 | 0 |  |  |  |  |  |  |  |  |  |
| P68719 | 0301-27 | 2062219 | 5505568 | 10 | 1.8 | 0.3 | 1 | 6.1 | 2.2 | 20 | 34 | 64.3 | 0 | 0 | 0 | 0 | 0 |  |  |  |  |  |  |  |  |  |
| P57098 |  | 2104290 | 5608110 | 30 | 3.1 | 0.6 | 1 |  |  |  |  |  |  |  |  |  |  |  |  |  |  |  |  |  |  |  |
| P57103 |  | 2101970 | 5609900 | 0 | 1.5 | 0.3 | 1 |  |  |  |  |  |  |  |  |  |  |  |  |  |  |  |  |  |  |  |
| P58924 |  | 2076880 | 5561900 | 1000 | 2.6 | 0.3 | 2 |  |  |  |  |  |  |  |  |  |  |  |  |  |  |  |  |  |  |  |
| MH0203 |  | 2076514 | 5562358 | 1160 | 2.7 | 0.4 | 3 |  |  |  |  |  |  |  |  |  |  | 11.2 | 2.1 | 3 |  |  |  |  |  |  |
| MH0233 |  | 2106633 | 5587489 | 1201 | 1.4 | 0.2 | 3 |  |  |  |  |  |  |  |  |  |  |  |  |  |  |  |  |  |  |  |
| MH0252 |  | 2067402 | 5581449 | 1075 | 3.6 | 0.4 | 4 |  |  |  |  |  |  |  |  |  |  |  |  |  |  |  |  |  |  |  |
| MH0256 |  | 2035708 | 5531718 | 1211 | 4.6 | 0.5 | 4 |  |  |  |  |  |  |  |  |  |  |  |  |  |  |  |  |  |  |  |
| MH0261 |  | 2018532 | 5483329 | 1083 | 9.8 | 1.5 | 3 |  |  |  |  |  |  |  |  |  |  |  |  |  |  |  |  |  |  |  |
| MH0262 |  | 2017490 | 5464754 | 1033 | 12.5 | 2.1 | 2 |  |  |  |  |  |  |  |  |  |  |  |  |  |  |  |  |  |  |  |
| MH0264 |  | 2042014 | 5486327 | 1066 | 5 | 0.5 | 5 |  |  |  |  |  |  |  |  |  |  | 13.9 | 2.2 | 4 |  |  |  |  |  |  |
| MH0282 |  | 2065210 | 5578556 | 0 | 2.6 | 0.3 | 4 |  |  |  |  |  |  |  |  |  |  |  |  |  |  |  |  |  |  |  |
| MH0298 |  | 2037825 | 5491278 | 0 | 3.8 | 0.5 | 3 |  |  |  |  |  |  |  |  |  |  | 13.6 | 3.1 | 2 |  |  |  |  |  |  |
| MH02103 |  | 2010127 | 5481825 | 0 | 14.8 | 2.7 | 2 |  |  |  |  |  |  |  |  |  |  |  |  |  |  |  |  |  |  |  |
| MH02113 |  | 2027952 | 5446749 | 0 | 12.1 | 1.3 | 5 |  |  |  |  |  |  |  |  |  |  | 89.6 | 16.6 | 3 |  |  |  |  |  |  |
| MH0217 |  | 2057874 | 5509255 | 1414 | 5.49 | 0.65 | 2 |  |  |  |  |  |  |  |  |  |  |  |  |  |  |  |  |  |  |  |
| MH0220 |  | 2062074 | 5506700 | 1212 | 2.61 | 0.31 | 2 |  |  |  |  |  |  |  |  |  |  |  |  |  |  |  |  |  |  |  |

Locations are NZMS 260 grid references. Full details are given elsewhere *[House et a*l., 2002*; House et a*l., 2005*; Sutherla*nd, 2007].

# References

House, M. A., M. Gurnis, P. J. J. Kamp, and R. Sutherland (2002), Uplift in the Fiordland region, New Zealand; implications for incipient subduction, *Science, 297*(5589), 2038-2041.

House, M. A., M. Gurnis, R. Sutherland, and P. J. J. Kamp (2005), Patterns of Late Cenozoic exhumation deduced from apatite and zircon U-He ages from Fiordland, New Zealand, *Geochemistry, Geophysics, and Geosystems, 6*, Q09013, doi:10.1029/ 2005GC000968.

Sutherland, R. (2007), A listing of cosmogenic, optically-stimulated-luminescence, (U-Th)/He, and fission-track sample locations, analyses, and age data compiled as part of Marsden contract GNS002 (2000-2004): subduction initiation beneath Fiordland, southwest New Zealand, *GNS Science Report, 2007/33*, 1-50.
